# Supplementary material for: Molecular subtyping and genomic profiling expand precision medicine in refractory metastatic triple-negative breast cancer: the FUTURE trial
Source: PubMed Central journal article supplement (PMC8027015; doi:10.1038/s41422-020-0375-9), 2020-07-27
Supplement: 41422_2020_375_MOESM2_ESM.pdf [file 41422_2020_375_MOESM2_ESM.pdf]

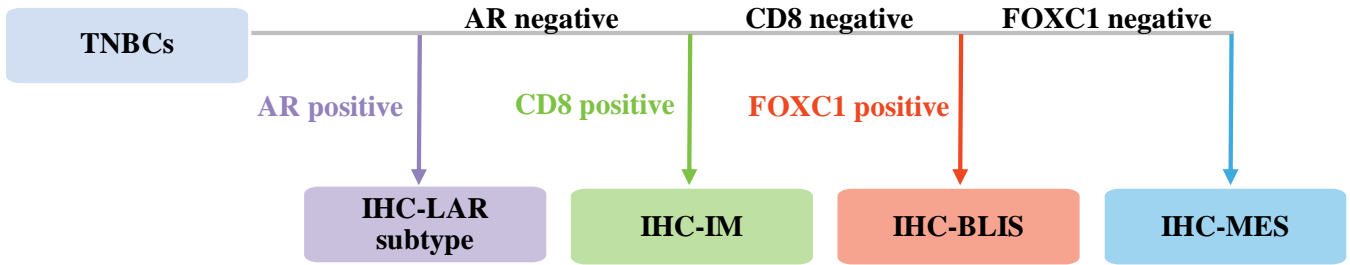

**Figure S1. Immunohistochemistry (IHC) based method defines the four subtypes of triple-negative breast cancer (TNBC)**

Abbreviations: LAR, luminal androgen receptor; IM, immunomodulatory; BLIS, basal-like immune-suppressed; MES, mesenchymal-like.
