# Supplementary material for: Molecular subtyping and genomic profiling expand precision medicine in refractory metastatic triple-negative breast cancer: the FUTURE trial
Source: PubMed Central journal article supplement (PMC8027015; doi:10.1038/s41422-020-0375-9), 2020-07-27
Supplement: 41422_2020_375_MOESM3_ESM.pdf [file 41422_2020_375_MOESM3_ESM.pdf]

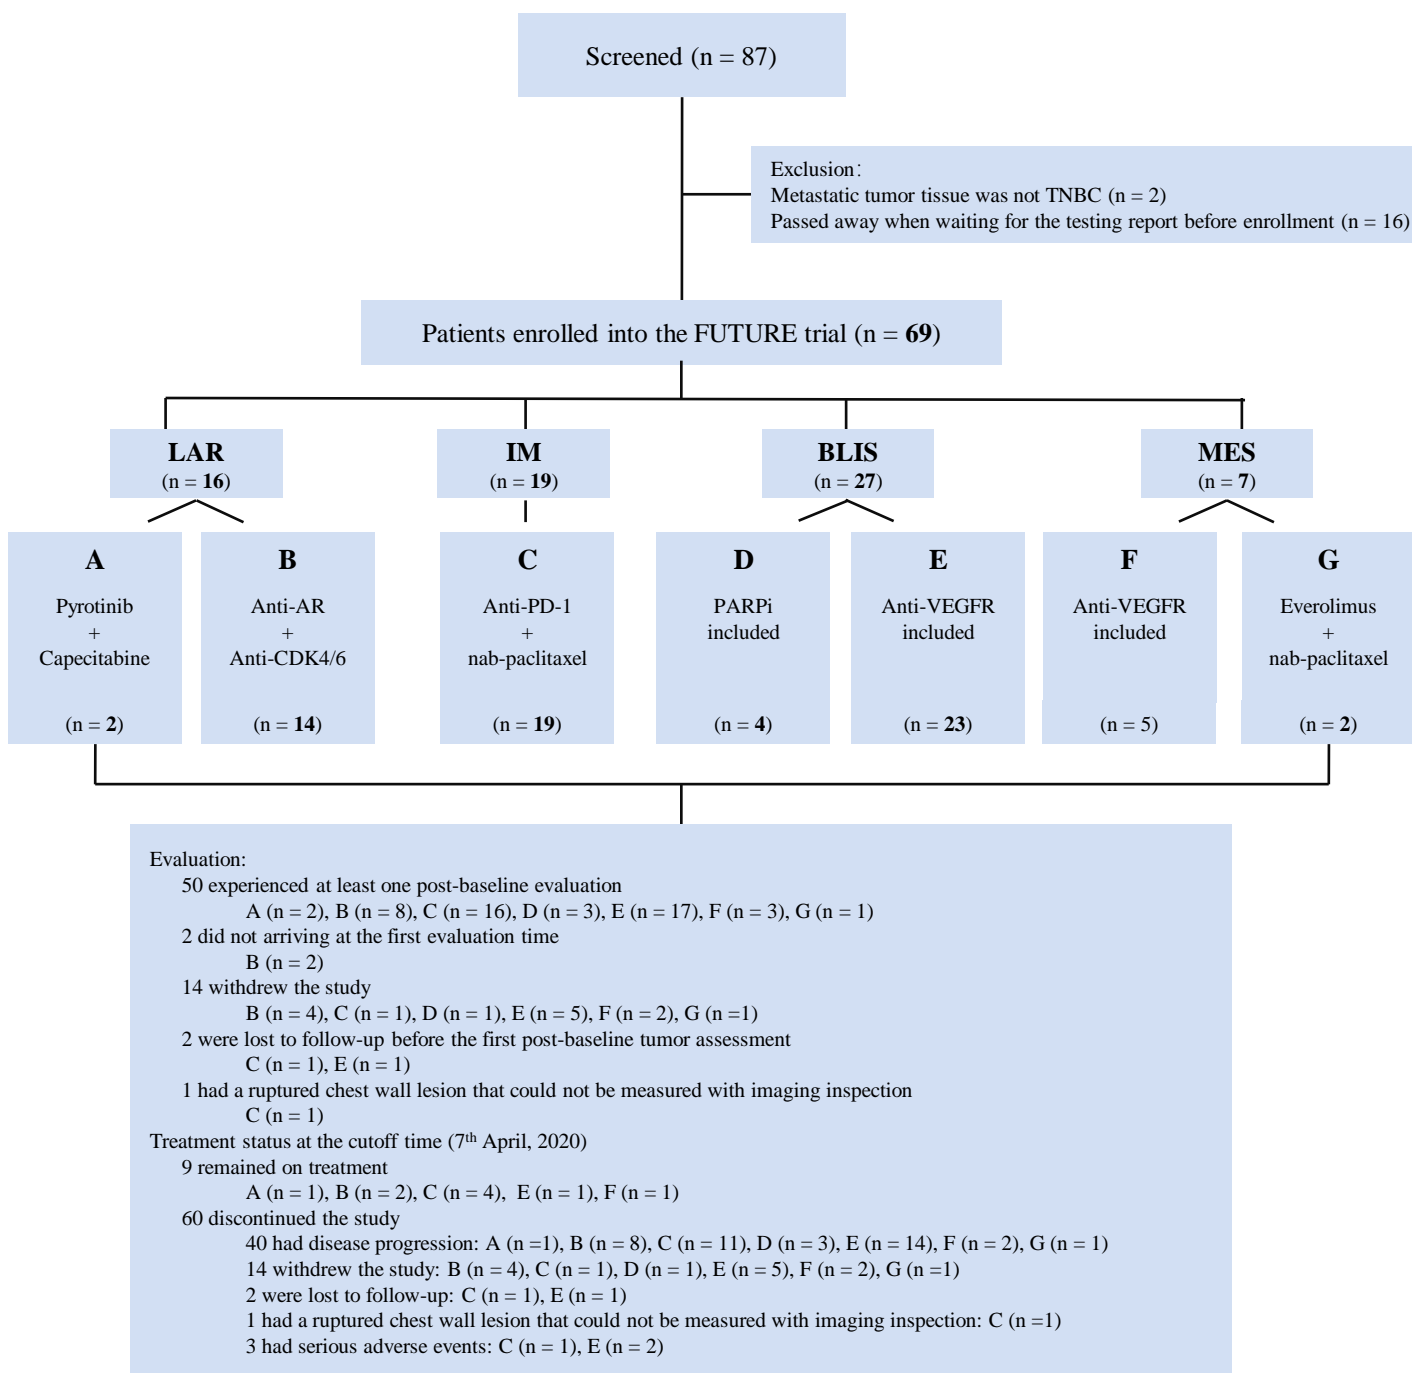

**Figure S2. The flow diagram of patient enrollment and treatment assignments**
