# Supplementary material for: Molecular subtyping and genomic profiling expand precision medicine in refractory metastatic triple-negative breast cancer: the FUTURE trial
Source: PubMed Central journal article supplement (PMC8027015; doi:10.1038/s41422-020-0375-9), 2020-07-27
Supplement: 41422_2020_375_MOESM7_ESM.pdf [file 41422_2020_375_MOESM7_ESM.pdf]

**a**

B001

| Characteristics                  |                                                                                                       |
|----------------------------------|-------------------------------------------------------------------------------------------------------|
| Age                              | 53                                                                                                    |
| Stage at diagnosis               | non-IV                                                                                                |
| ECOG                             | 1                                                                                                     |
| Metastatic organ                 | Lung, Liver, bone                                                                                     |
| No. of previous lines of therapy | 5                                                                                                     |
| Drugs that have been used        | Anthracyclines, paclitaxel, carboplatin, vinorelbine, capecitabine, gemcitabine, tegafur and apatinib |
| IHC results                      | AR (+, 90%), <b>CD8 (+, 25%)</b> , FOXC1 (-)                                                          |

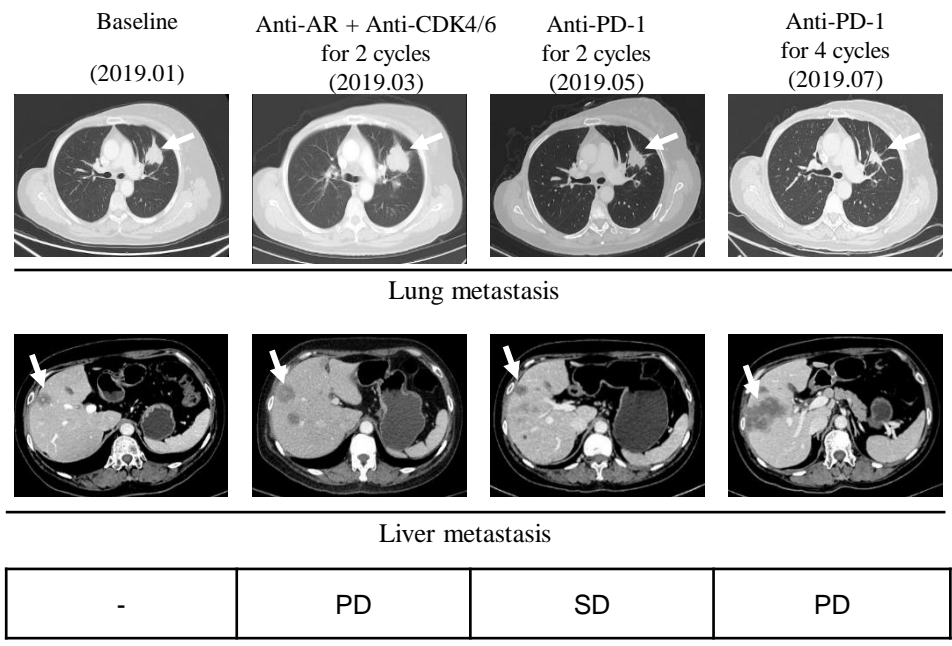**b**

B002

| Characteristics                  |                                                                                 |
|----------------------------------|---------------------------------------------------------------------------------|
| Age                              | 48                                                                              |
| Stage at diagnosis               | non-IV                                                                          |
| ECOG                             | 1                                                                               |
| Metastatic organ                 | Lung                                                                            |
| No. of previous lines of therapy | 5                                                                               |
| Drugs that have been used        | Anthracyclines, paclitaxel, carboplatin, vinorelbine, gemcitabine, capecitabine |
| IHC results                      | AR3(+, 90%), CD8 (-), FOXC1 (-)                                                 |
| SCNV                             | <b>FGFR1 amplification</b>                                                      |

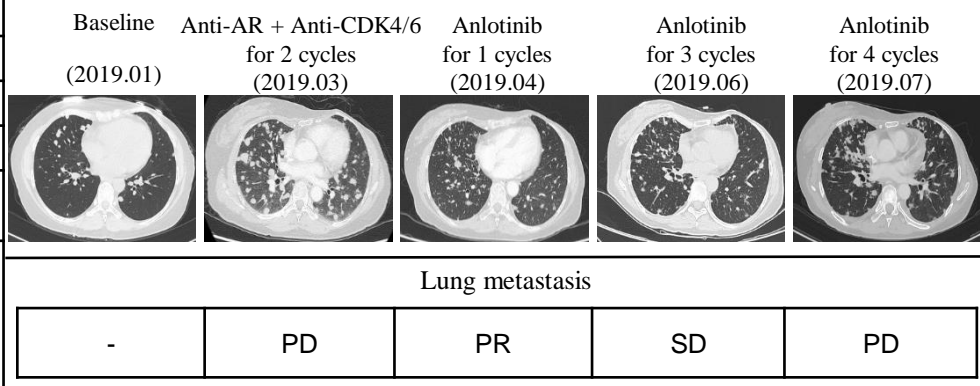

### Figure S6. Patients benefited from other targets except for anti-AR plus anti-CDK 4/6 in arm B

(a) One patient with AR (+) and CD8 (+, 25%) benefited from anti-PD-1 therapy after progressed from therapy of arm B; (b) One patient with FGFR1 amplification benefited from anlotinib therapy after progressed from therapy of arm B

Abbreviations: PR, partial response; SD, stable disease; PD, progressive disease; ECOG, Eastern Cooperative Oncology Group.
