# Supplementary material for: Molecular subtyping and genomic profiling expand precision medicine in refractory metastatic triple-negative breast cancer: the FUTURE trial
Source: PubMed Central journal article supplement (PMC8027015; doi:10.1038/s41422-020-0375-9), 2020-07-27
Supplement: 41422_2020_375_MOESM8_ESM.pdf [file 41422_2020_375_MOESM8_ESM.pdf]

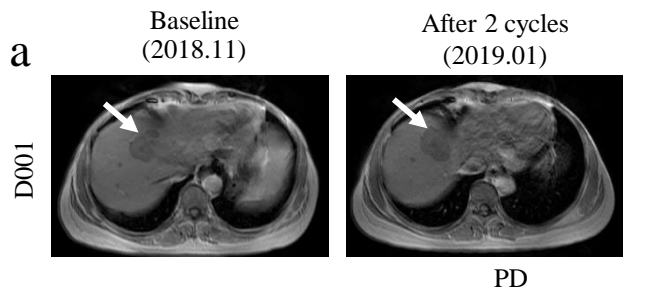

Liver metastasis

| Characteristics                  |                                                                       |
|----------------------------------|-----------------------------------------------------------------------|
| Age                              | 48                                                                    |
| Stage at diagnosis               | Non-IV                                                                |
| ECOG                             | 1                                                                     |
| Metastatic organ                 | Liver                                                                 |
| No. of previous lines of therapy | 2                                                                     |
| Drugs that have been used        | Anthracyclines, paclitaxel, carboplatin, vinorelbine and capecitabine |
| IHC results                      | AR (+, 80%), CD8 (+, 10%), FOXC1(-)                                   |

| FUSCC NGS panel                |               |                                           |         |
|--------------------------------|---------------|-------------------------------------------|---------|
| Variants type                  | Gene          | Site                                      | VAF (%) |
| Pathological Germline mutation | <i>BRCA2</i>  | NM_000059:exon11:c.5718_5719del:p.N1906fs | -       |
| Somatic mutation               | <i>AFDN</i>   | NM_001291964:exon13:c.G1553C:p.R518T      | 17.4    |
|                                | <i>FAM47C</i> | NM_001013736:exon1:c.G1339T:p.V447L       | 10.9    |
|                                | <i>MAST2</i>  | NM_015112:exon29:c.G4306A:p.E1436K        | 10.5    |
|                                | <i>PLK2</i>   | NM_006622:exon11:c.G1468C:p.D490H         | 11.3    |
|                                | <i>EHMT2</i>  | NM_001289413:exon17:c.G2474A:p.R825H      | 2.5     |
|                                | <i>FASN</i>   | NM_004104:exon42:c.G7153C:p.E2385Q        | 10.9    |
|                                | <i>NR1H2</i>  | NM_007121:exon3:c.C35A:p.P12H             | 2.9     |
|                                | <i>ARID1B</i> | NM_017519:exon1:c.511_521del:p.A171fs     | 14.7    |

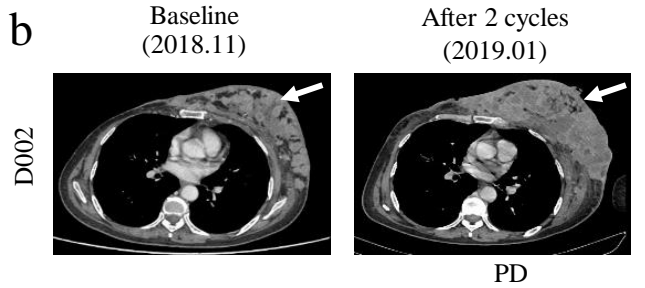

Chest metastasis

| Characteristics                  |                                                                       |
|----------------------------------|-----------------------------------------------------------------------|
| Age                              | 56                                                                    |
| Stage at diagnosis               | IV                                                                    |
| ECOG                             | 1                                                                     |
| Metastatic organ                 | Breast, lung, bone, lymph nodes, right chest                          |
| No. of previous lines of therapy | 3                                                                     |
| Drugs that have been used        | Anthracyclines, paclitaxel, carboplatin, vinorelbine and capecitabine |
| IHC results                      | AR (-), CD8 (+, 10%), FOXC1 (+, 50%)                                  |

| FUSCC NGS panel                |               |                                    |         |
|--------------------------------|---------------|------------------------------------|---------|
| Variants type                  | Gene          | Site                               | VAF (%) |
| Pathological Germline mutation | <i>BRCA1</i>  | NM_007294:exon21:c.G5345A:p.W1782X | -       |
| Somatic mutation               | <i>RICTOR</i> | NM_152756:exon23:c.G2323A:p.D775N  | 15.4    |
|                                | <i>CYP2C8</i> | NM_000770:exon1:c.G4T:p.E2X        | 3.2     |
|                                | <i>MAP2K4</i> | NM_003010:exon1:c.G3T:p.M1I        | 3.8     |
|                                | <i>MAP2K4</i> | NM_003010:exon2:c.C212A:p.P71Q     | 16.7    |
|                                | <i>BMX</i>    | NM_001721:exon15:c.C1534A:p.Q512K  | 7.3     |

## Figure S7. Genomic features of TNBCs in arm D

(a-b) Clinical characteristics and genomic landscape of D001(a) and D002 (b).

Abbreviations: PD, progressive disease; IHC, immunohistochemistry
